# Supplementary material
Source: HighWire-hosted journal article supplement (doi:10.1101/rna.079070.121)
Supplement: Supplemental_Legends.docx [file Supplemental_Legends.docx]

**Figure S1: *Firre* expression and localization in mouse and human cells**

(A, B) Maximum intensity projections of smRNA-FISH for *Firre* exon and RRD on wild type (WT) and *Firre*-deficient (*FirreKO*) mouse ES cells (A) as well as human iPS cells and human foreskin fibroblasts (BJ) (B). Nuclei are stained with Hoechst (blue), *Firre* exon in green, RRD in magenta. Scale bar is 5 μm.

(C, D) Absolute and relative quantification of *Firre* FISH signals in the nucleus (N, black) and cytoplasm (C, gray) of mouse (C) and human cell lines (D). The heights of the bars and vertical lines indicate mean and standard deviation, respectively.

(E, F) RNA-seq analysis of *Firre* expression in mouse (E) and human cell lines (F). Data are mean and non-outlier range of analyzed data sets.

**Figure S2: Comparison of local and global repeats within the mouse and human *Firre* locus**

(A, B) Matrices indicating the shared identity between RRD sequences (top) and tracks showing global sequence alignments and conservation of RRDs (bottom) for the mouse (A) and human *Firre* locus (B).

(C) Percentage of repeats in the mouse and human *Firre* locus.

(D) Quantification of *hFIRRE* exon FISH signals co-localizing (Co) and not co-localizing (Not co) with HERV-H in human iPS cells in absolute (left) and in relative amounts per cell (right). Data are mean and non-outlier range of quantified cells.

(E) Maximum intensity projections of smRNA FISH for HERV-H transcripts and *hTUG1* intron on human iPS cells. The brightest *hTUG1* intron spots are highlighted by arrows to indicate *hTUG1* transcription sites. Nuclei are stained with Hoechst (blue), HERV-H in magenta, *hTUG1* intron in green. Scale bar is 5 μm.

**Table S1: smRNA FISH probe sequences**

**Table S2: RNA-seq accession numbers for *Firre* abundance measurements**
